# Supplementary material for: Perceptions of Light Pollution and its Impacts: Results of an Irish Citizen Science Survey
Source: MDPI journal article supplement (doi:10.3390/ijerph17155628), 2020-08-04
Supplement: s1 [file s1]

## ALAN Questionnaire

### *Light at Night Questionnaire*

Q.1

Which of the following best describes where you live?

- Rural area
- Small town (<3,000 people)
- Large town (>3,000 people)
- City Centre
- City Suburbs
- Other:

Q.2

How bright is the night-time environment around where you live (or work, if you are a night worker)?

- Completely dark (Milky Way regularly visible to the horizon)
- Dark (>100 stars and Milky Way regularly visible overhead)
- Few stars visible and no Milky Way
- Only Moon and brighter planets visible
- Unsure

Q.3

What is the strongest light source near your home?

- Own domestic lighting
- Neighbours' lighting
- Commercial/Retail lighting
- Public lighting
- Passing traffic
- Other:

Q.4

Is this strong light source on all night?

- Yes
- No
- Intermittent
- Unsure

Q.5

Please indicate your level of agreement with the following statements

|                                                                                                                  | Strongly<br>Disagree | Disagree | Somewhat<br>Disagree | Neutral | Somewhat<br>Agree | Agree | Strongly<br>Agree | Not<br>Applicable<br>/ No<br>Opinion |
|------------------------------------------------------------------------------------------------------------------|----------------------|----------|----------------------|---------|-------------------|-------|-------------------|--------------------------------------|
| 'The level of lighting<br>near my home at night<br>has increased over the<br>past three years'                   |                      |          |                      |         |                   |       |                   |                                      |
| 'If light enters my<br>bedroom at night it does<br>not affect my sleep'                                          |                      |          |                      |         |                   |       |                   |                                      |
| 'Birds sing at night (the<br>dawn chorus starts<br>earlier than it used to)'                                     |                      |          |                      |         |                   |       |                   |                                      |
| 'The number of bats I<br>see has increased<br>recently'                                                          |                      |          |                      |         |                   |       |                   |                                      |
| 'The natural night-time<br>behaviour of<br>insects/bats/foxes etc.,<br>remains the same as in<br>previous years' |                      |          |                      |         |                   |       |                   |                                      |

Q.6

Which of the following statements best describes your attitude towards night-themed events (such as dark sky festivals, night walks/runs, etc)?

Please select all that apply

- ☐ I have previously participated in night-themed events
- ☐ I am interested in attending night-themed events in the future
- ☐ I am not interested in night-themed events
- Other:

Q.7

What is your age?

- 18-24
- 25-34
- 35-44
- 45-54
- 55-64
- 65+
- Prefer not to say

Q.8

What is your gender identity?

- Male
- Female
- Prefer not to say
- Other:
